# Supplementary material
Source: HighWire-hosted journal article supplement (https://diabetes.diabetesjournals.org/content/suppl/2007/03/16/db06-1230)

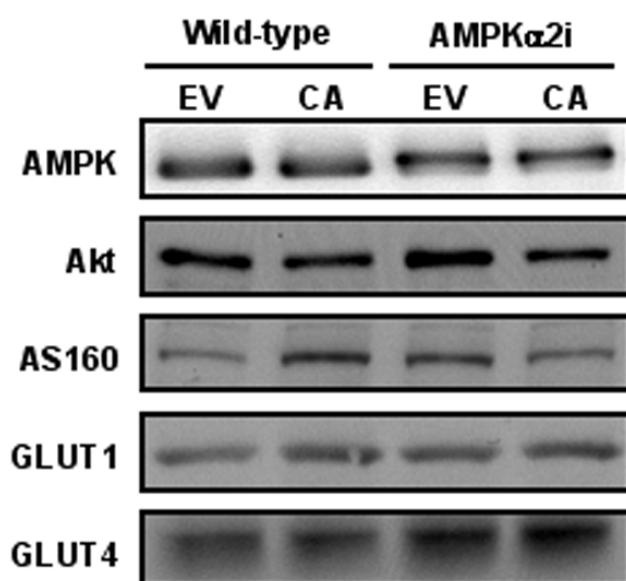

Supplement: db1230OnlineAppendix.pdf [file db1230OnlineAppendix.pdf]
